# Supplementary material for: Solvent-responsive polymer nanocapsules with controlled permeability: encapsulation and release of a fluorescent dye by swelling and deswelling
Source: Royal Society of Chemistry journal article supplement (doi:10.1039/b823110a), 2009-01-01
Supplement: b823110a.pdf [file b823110a.pdf]

## Electronic Supplementary Information

### Solvent-responsive polymer nanocapsules with controlled permeability: encapsulation and release of a fluorescent dye by swelling and deswelling

Eunju Kim,<sup>a</sup> Jiyeong Lee,<sup>a</sup> Dongwoo Kim,<sup>a</sup> Kyung Eun Lee,<sup>b</sup> Sung Sik Han,<sup>b</sup>  
Namseok Lim,<sup>c</sup> Juseok Kang,<sup>c</sup> Chan Gyung Park<sup>c</sup> and Kimoon Kim\*<sup>a</sup>

<sup>a</sup>National Creative Research Initiative Center for Smart Supramolecules (CSS) and Department of Chemistry, Pohang University of Science and Technology (POSTECH), Pohang, 790-784, Korea. <sup>b</sup>School of Life Science & Biotechnology, Korea University, Seoul, 131-701, Korea. <sup>c</sup>Department of Materials Science and Engineering, Pohang University of Science and Technology Pohang, 790-784, Korea. Fax: +82 54-279-8129; Tel: +82 54-279-2113; E-mail: kkim@postech.ac.kr

#### General Methods.

All the reagents and solvents employed were commercially available and used as supplied without further purification. (Allyloxy)<sub>12</sub>cucurbit[6]uril (**1**) was synthesized according to literature.<sup>S1</sup> Polymer nanocapsule **3** was prepared by thiol-ene photopolymerization of (allyloxy)<sub>12</sub>cucurbit[6]uril, dithiol **2** as described previously.<sup>S2</sup> The average diameter of **3** was 120 ± 40 nm as measured by dynamic light scattering experiments. Photoreaction was performed in a quartz tube by irradiating UV light at 29 °C using a Rayonet photochemical reactor (Model: RMR-600) equipped with four 254 nm lamps and four 300 nm lamps. All fluorescence measurements were performed with 10-mm quartz cells on a Shimadzu RF-5301PC spectrofluorometer. Dialysis was performed using a Spectra/Por<sup>®</sup> RC membrane (MWCO: 8,000). Dynamic light scattering experiments were performed on a DLS-7000 instrument (Otsuka Electronics) using an argon ion laser operating with vertically polarized light at λ = 488 nm. SEM images were collected using a Phillips XL30S FEG scanning electron microscope operating at 5 kV. High-resolution TEM images were recorded on a JEOL-2010F electron microscope operating at 200 kV. Cryo-TEM images were recorded on a Tecnai 12 electron microscope (Phillips, Eindhoven, Netherlands) at approximately -170 °C and with a 120 kV acceleration voltage equipped with a Multiscan 600W CCD camera (Gatan, Inc., Warrendale, PA).

**Synthesis of polymer nanocapsule 4.** Excess ethyl vinyl ether (505 mg, 7.0 mmol) was added to a dispersion of polymer nanocapsule **3** (20.5 mg) in methanol (10 mL). The mixture was then irradiated with UV light (254 nm and 300 nm) for 20 h after purged with N<sub>2</sub>. The product was purified by dialysis with methanol for 2 days to obtain a colloidal solution of polymer nanocapsules **4**, which was usually used for further experiments. After removal of most of the solvent, addition of diethyl ether yielded polymer nanocapsule **4** (13.6 mg, 74 %). Anal. Calcd. for [(C<sub>72</sub>H<sub>96</sub>N<sub>24</sub>O<sub>24</sub>)(C<sub>6</sub>H<sub>12</sub>O<sub>2</sub>S<sub>2</sub>)<sub>7.4</sub>(C<sub>4</sub>H<sub>9</sub>O<sub>1</sub>)<sub>2.8</sub>(CH<sub>4</sub>O)<sub>9</sub>(C<sub>4</sub>H<sub>10</sub>O)<sub>3</sub>]<sub>n</sub>: C, 47.84; H, 7.46; N, 9.01; S, 12.72%; found: C, 47.18; H, 6.86; N, 8.44; S, 11.94%.

**Swelling and deswelling of polymer nanocapsule 4.** The polymer nanocapsule **4** (136  $\mu\text{g}$ ) dispersed in pure methanol (100  $\mu\text{L}$ ) was added to methanol-water mixtures (9.9 mL) to make the final composition of the solvent such as 1, 5, 10, 20, 90, 95, 99 % water/methanol and incubated for a day. The average size change of the nanocapsule in response to the change in solvent composition was monitored by DLS studies and the sizes of the nanocapsules **4** in pure methanol and 10% methanol/water were also measured by cryo-TEM. In addition, the kinetics of the swelling process of the polymer nanocapsules **4** was monitored in 5 and 10% methanol/water mixtures by DLS daily for 15 days (Fig. S1). The deswelling experiment was carried out by placing the nanocapsule **4** that had been swelled in 10% methanol/water mixture in pure methanol for 1 day, and the hydrodynamic radius was measured by DLS.

**Encapsulation of carboxyfluorescein into the polymer nanocapsule 4.** For swelling a dispersion of polymer nanocapsule **4** (1.36 mg) in methanol (1 mL) was added to water (9 mL) to make the final solvent composition 10% methanol/water, and was incubated for 1 day. Subsequently, carboxyfluorescein (CF, 1.760 mg, 4.68  $\mu\text{mol}$ ; 10.0 equiv with respect to the amount of the CB[6] unit present in the nanocapsule) was added to the solution as a guest molecule, and the mixture was stirred for another day. The resulting dispersion was purified by dialysis against methanol for 4 days to give a colloidal solution of CF loaded polymer nanocapsule, CF@**4**. During the dialysis free (unencapsulated) CF was removed and collected. The amount of free CF was measured by fluorometry. The amount of CF loaded in nanocapsule **4** was calculated by subtracting this number from the initial amount CF, which was found to be 0.43  $\mu\text{g}$  per 1.0 mg of polymer nanocapsules **4**. The average diameter of the dye-loaded nanocapsule, CF@**4**, was determined by DLS. The successful encapsulation of the guest molecules was confirmed by fluorometry (Fig. S2).

**Release of carboxyfluorescein from the polymer nanocapsule loaded with carboxyfluorescein (CF@4).** The above CF loaded nanocapsule (0.23  $\mu\text{g}$  of CF/544  $\mu\text{g}$  of **4**) in methanol (4 mL) was dialyzed against methanol/water (36/360 mL) mixture, which ensures the final composition of the solvent 10% methanol/water, for 25 days. The release of CF during the dialysis was monitored by fluorometry daily by taking a small aliquot of the solution in a given interval. The amount of released CF was measured up to the saturation point in the release profile using a calibration curve of CF in 10 % methanol/water. At the end of the dialysis (25 days), approximately 91% of encapsulated CF molecules were found to be released compared to the amount of loaded CF.

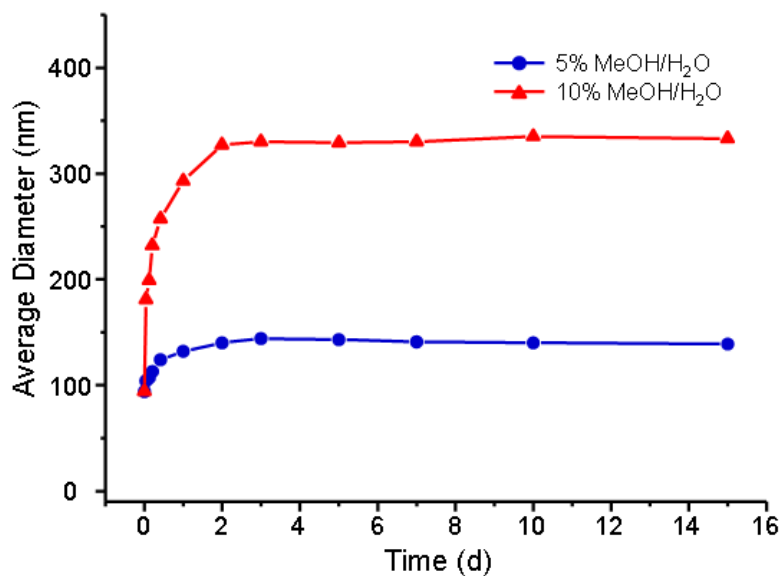

**Fig. S1** Size change of polymer nanocapsule 4 in 5 % (●) and 10 % (▲) methanol/water as a function of time.

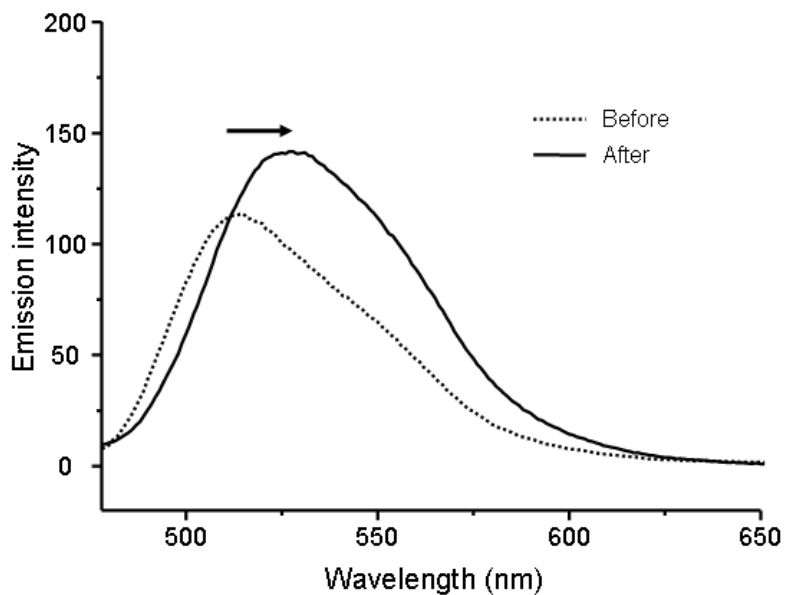

**Fig. S2** Emission spectra of polymer nanocapsules CF@4 (solid line,  $\lambda_{\text{ex}} = 458 \text{ nm}$ ,  $\lambda_{\text{em}} = 527 \text{ nm}$ ) and carboxyfluorescein before (dashed line,  $\lambda_{\text{ex}} = 458 \text{ nm}$ ,  $\lambda_{\text{em}} = 512 \text{ nm}$ ) in methanol.

**Reference**

- [S1] S. Y. Jon, N. Selvapalam, D. H. Oh, J.-K. Kang, S.-Y. Kim, Y. J. Jeon, J. W. Lee, and K. Kim, *J. Am. Chem. Soc.*, 2003, **125**, 10186.
- [S1] D. Kim, E. Kim, J. Kim, K. M. Park, K. Baek, M. Jung, Y. H. Ko, W. Sung, H. Kim, J. H. Suh, C. G. Park, O. S. Na, D.-k. Lee, K. E. Lee, S. S. Han and K. Kim, *Angew. Chem., Int. Ed.*, 2007, **46**, 3471.
